# Supplementary material for: Association of markers of endothelial activation and dysfunction with occurrence and outcome of pulmonary hemorrhage in dogs with leptospirosis
Source: PubMed Central journal article supplement — J Vet Intern Med. 2021 Jun 2;35(4):1789–99. doi: 10.1111/jvim.16163 (PMC8295707; doi:10.1111/jvim.16163), 2021-06-02
Supplement: JVIM-35-1789-s002.pdf [file JVIM-35-1789-s002.pdf]

**Supplemental Table 2:** Calculation of the correction factor

|                     | <b>Dog 1</b>       | <b>Dog 2</b>       | <b>Dog 3</b>       | <b>Mean</b> | <b>Correction factor</b> |
|---------------------|--------------------|--------------------|--------------------|-------------|--------------------------|
|                     | sICAM-1<br>(ng/mL) | sICAM-1<br>(ng/mL) | sICAM-1<br>(ng/mL) |             |                          |
| Plate<br>12/20/2016 | 358.85             | 29.86              | 15.79              | 134.83      | .42                      |
| Plate<br>12/21/2016 | 137.13             | 20.29              | 12.18              | 56.53       | Reference Plate          |
| Plate<br>02/15/2017 | 100.70             | 9.78               | 5.00               | 38.48       | 1.47                     |
