# Supplementary material for: Association of markers of endothelial activation and dysfunction with occurrence and outcome of pulmonary hemorrhage in dogs with leptospirosis
Source: PubMed Central journal article supplement — J Vet Intern Med. 2021 Jun 2;35(4):1789–99. doi: 10.1111/jvim.16163 (PMC8295707; doi:10.1111/jvim.16163), 2021-06-02
Supplement: JVIM-35-1789-s003.pdf [file JVIM-35-1789-s003.pdf]

**Supplemental Table 1:** Handling of high inter-assay variability of soluble intercellular adhesion molecule-1 (sICAM-1). <sup>A</sup> Significantly different from healthy control.

Abbreviations: AKI-nL, acute kidney injury due to other etiologies; D1, day 1; Lepto, leptospirosis without LPHS; LPHS, leptospirosis with LPHS; n, number of samples

| <b>Date</b>      | <b>n</b> | <b>Healthy</b><br>(ng/mL) | <b>n</b> | <b>AKI-nL</b><br>(ng/mL)               | <b>n</b> | <b>Lepto</b><br>(ng/mL) | <b>n</b> | <b>LPHS</b><br>(ng/mL)               | <b>p-value</b> |
|------------------|----------|---------------------------|----------|----------------------------------------|----------|-------------------------|----------|--------------------------------------|----------------|
| D1<br>12/20/2016 | 7        | 29.9<br>(13.1-<br>53.8)   | 4        | 141.3<br>(60.6-<br>324.1) <sup>A</sup> | 0        | -                       | 4        | 170.2<br>(46.5-<br>224.3)            | .02            |
| D1<br>12/21/2016 | 17       | 20.3<br>(13.1-<br>30.2)   | 5        | 74.2<br>(46.2-<br>109.3) <sup>A</sup>  | 6        | 48.4<br>(30.1-<br>58.8) | 6        | 78.3<br>(55.8-<br>91.7) <sup>A</sup> | .001           |
| D1<br>02/15/2017 | 12       | 8.5<br>(2.7-13.7)         | 9        | 22.1<br>(10.6-40.3)                    | 3        | 21.0<br>(20.8-<br>44.6) | 5        | 29.6<br>(18.6-<br>48.3) <sup>A</sup> | .008           |
